# Supplementary material for: Seeing the electroporative uptake of cell-membrane impermeable fluorescent molecules and nanoparticles
Source: Royal Society of Chemistry journal article supplement (doi:10.1039/c2nr30578j), 2012-01-01
Supplement: c2nr30578j_2.pdf [file c2nr30578j_2.pdf]

## Supplementary Figures

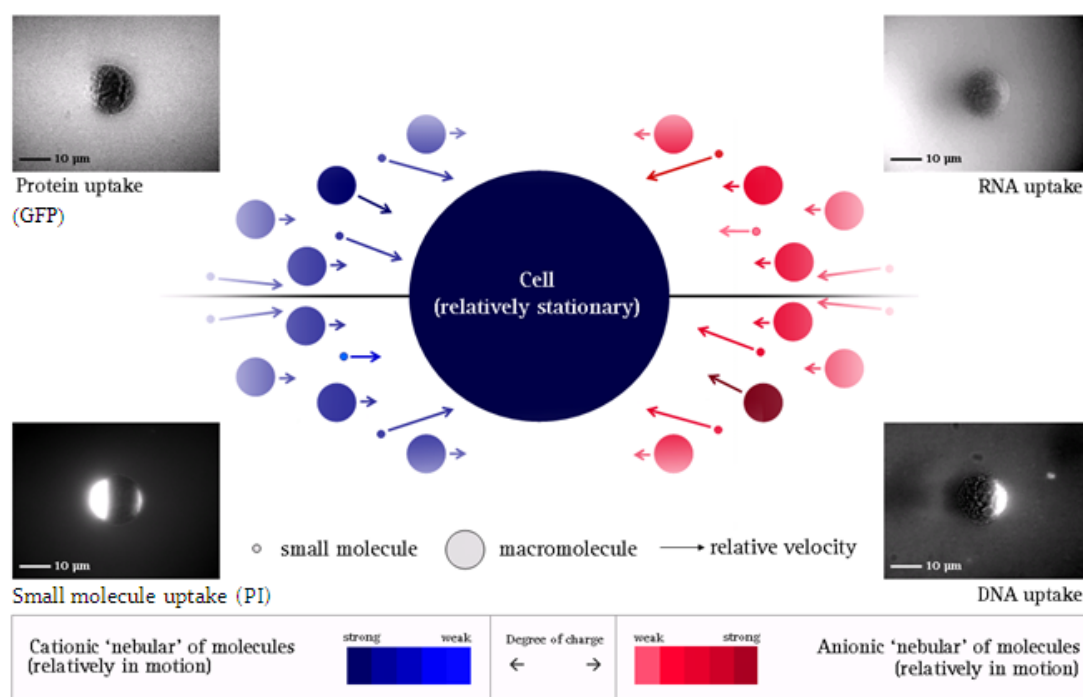

Figure S1. Schematic of relative motion of cationic and anionic molecules in electroporation

Comparison of relative speed according to size and polarity of molecules: High degree of charge molecules displays relatively strong color. The length of the arrow indicates relative velocity. The cell is relatively stationary.

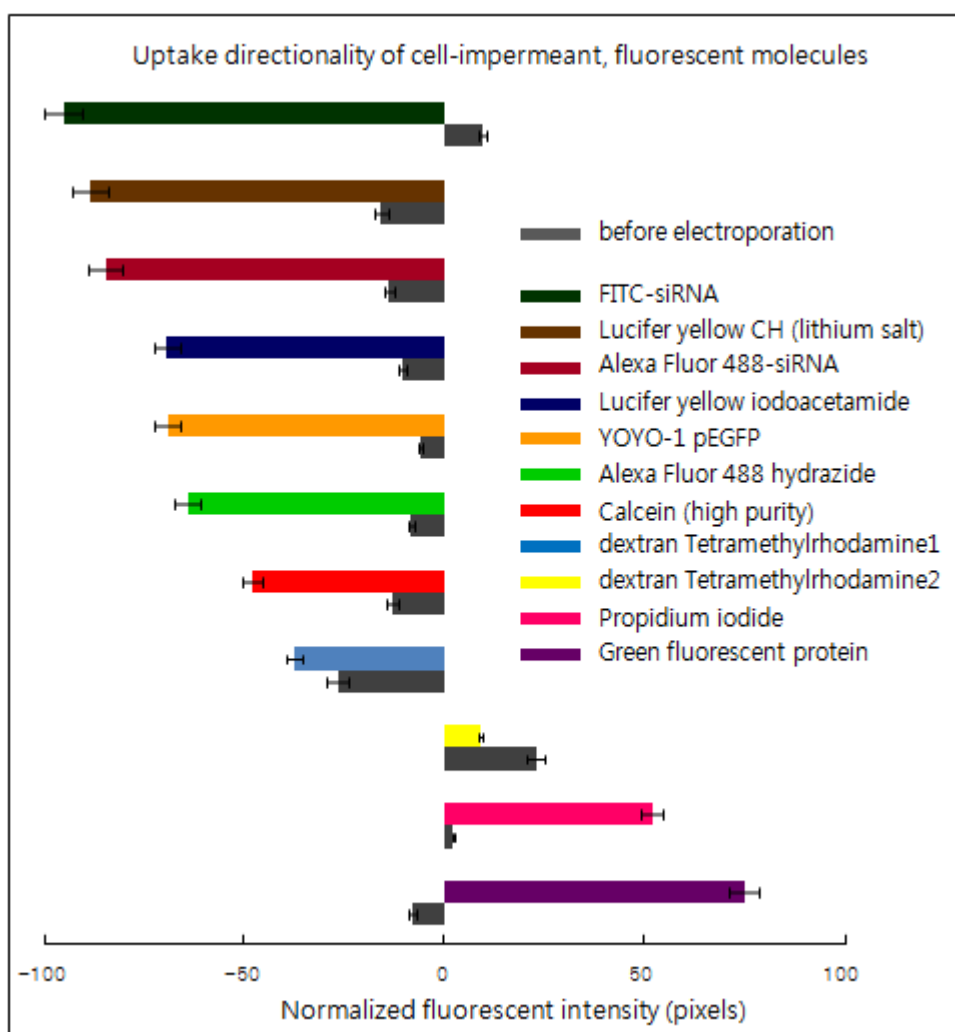

Figure S2. Summary of uptake direction and normalized intensity before and after electroporation using fluorescent cell-membrane impermeant molecules
